# Supplementary material for: Synthesis, electrical behaviour, and crystal and electronic band structures of two different phases of the (SMeEt2)[Pd(dmit)2]2 salt. Consequences of cationic disorder on the electrical properties
Source: Royal Society of Chemistry journal article supplement (doi:10.1039/b102133h), 2001-01-01
Supplement: b102133h.doc [file b102133h.doc]

List of Tables in the Supplementary Material (29 pages)

Table S1. Crystal data and structure refinement for (SMeEt2)[Pd(dmit)2]2 (**1**) at room temperature.

Table S2. Atomic coordinates ( x 10^4) and equivalent isotropic displacement parameters (A^2 x 10^3) for (SMeEt2)[Pd(dmit)2]2 (**1**) at room temperature.

Table S3. Bond lengths [A] and angles [deg] for (SMeEt2)[Pd(dmit)2]2 (**1**) at room temperature.

Table S4. Anisotropic displacement parameters (A^2 x 10^3) for (SMeEt2)[Pd(dmit)2]2 (**1**) at room temperature.

Table S5. Hydrogen coordinates ( x 10^4) and isotropic displacement parameters (A^2 x 10^3) for (SMeEt2)[Pd(dmit)2]2 (**1**) at room temperature.

Table S6. Crystal data and structure refinement for (SMeEt2)[Pd(dmit)2]2 (**1**) at 160 K.

Table S7. Atomic coordinates ( x 10^4) and equivalent isotropic displacement parameters (A^2 x 10^3) for (SMeEt2)[Pd(dmit)2]2 (**1**) at 160 K.

Table S8. Bond lengths [A] and angles [deg] for (SMeEt2)[Pd(dmit)2]2 (**1**) at 160 K.

Table S9. Anisotropic displacement parameters (A^2 x 10^3) for (SMeEt2)[Pd(dmit)2]2 (**1**) at 160 K

Table S10. Hydrogen coordinates ( x 10^4) and isotropic displacement parameters (A^2 x 10^3) for (SMeEt2)[Pd(dmit)2]2 (**1**) at 160 K.

Table S11. Crystal data and structure refinement for (SMeEt2)0.5[Pd(dmit)2] (**2**) at 160 K.

Table S12. Atomic coordinates ( x 10^4) and equivalent isotropic displacement parameters (A^2 x 10^3) for (SMeEt2)0.5[Pd(dmit)2] (**2**) at 160 K.

Table S13. Bond lengths [A] and angles [deg] for (SMeEt2)0.5[Pd(dmit)2] (**2**) at 160 K.

Table S14. Anisotropic displacement parameters (A^2 x 10^3) for (SMeEt2)0.5[Pd(dmit)2] (**2**) at 160 K

Table S15. Hydrogen coordinates ( x 10^4) and isotropic displacement parameters (A^2 x 10^3) for (SMeEt2)0.5[Pd(dmit)2] (**2**) at 160 K.

Table S16. Crystal data and structure refinement for (SMeEt2)0.5[Pd(dmit)2] (**2**) at room temperature.

Table S17. Atomic coordinates ( x 10^4) and equivalent isotropic displacement parameters (A^2 x 10^3) for (SMeEt2)0.5[Pd(dmit)2] (**2**) at room temperature

Table S18. Bond lengths [A] and angles [deg] for (SMeEt2)0.5[Pd(dmit)2] (**2**) at room temperature.

Table S19. Anisotropic displacement parameters (A^2 x 10^3) for (SMeEt2)0.5[Pd(dmit)2] (**2**) at room temperature

Table S20. Hydrogen coordinates ( x 10^4) and isotropic displacement parameters (A^2 x 10^3) for (SMeEt2)0.5[Pd(dmit)2] (**2**) at room temperature.

Table S21 : Short S…S distances (< 3.70 Å) between the Pd(dmit)2 units in (SMeEt2)0.5[Pd(dmit)2] (**2**) at room temperature

Table S1. Crystal data and structure refinement for (SMeEt2)[Pd(dmit)2]2 (**1**) at room temperature.

Identification code (SMeEt2)[Pd(dmit)2]2 (**1**)

Empirical formula C17 H13 Pd2 S21

Formula weight 1103.58

Temperature 293(2) K

Wavelength 0.71073 A

Crystal system, space group Triclinic, P-1

Unit cell dimensions a = 7.804(4) A alpha = 91.68(4) deg.

b = 36.171(18) A beta = 112.08(4) deg.

c = 6.284(2) A gamma = 88.79(5) deg.

Volume 1642.9(13) A^3

Z, Calculated density 2, 2.230 Mg/m^3

Absorption coefficient 2.446 mm^-1

F(000) 1086

Crystal size 0.30 x 0.25 x 0.05 mm

Theta range for data collection 1.13 to 22.5 deg.

Limiting indices -8<=h<=13, -38<=k<=38, 0<=l<=6

Reflections collected / unique 4698 / 4305 [R(int) = 0.2488]

Completeness to theta = 22.5 21.5 %

Absorption correction Psi-scan

Max. and min. transmission 0.9902 and 0.5116

Refinement method Full-matrix least-squares on F^2

Data / restraints / parameters 4305 / 71 / 394

Goodness-of-fit on F^2 1.150

Final R indices [I>2sigma(I)] R1 = 0.0651, wR2 = 0.1708

R indices (all data) R1 = 0.1022, wR2 = 0.1987

Largest diff. peak and hole 1.701 and -1.224 e.A^-3

Table S2. Atomic coordinates ( x 10^4) and equivalent isotropic

displacement parameters (A^2 x 10^3) for (SMeEt2)[Pd(dmit)2]2 (**1**) at room temperature.

U(eq) is defined as one third of the trace of the orthogonalized

Uij tensor.

________________________________________________________________

x y z U(eq)

________________________________________________________________

S(1) 4510(11) 2526(2) 7682(12) 106(2)

C(1A) 3360(50) 2331(11) 5060(30) 78(8)

C(1B) 4410(50) 2081(7) 6370(50) 68(8)

C(2) 4830(40) 2838(9) 5670(50) 130(9)

C(3A) 6590(90) 2760(20) 5250(170) 130(20)

C(3B) 6110(120) 2620(20) 4800(200) 160(20)

C(4) 2110(40) 2618(8) 7270(40) 112(8)

C(5A) 2020(110) 2427(19) 9300(90) 121(18)

C(5B) 1350(90) 2319(18) 8250(90) 107(17)

Pd(1) 1880(2) 4816(1) 10178(2) 31(1)

S(11) 370(6) 4344(1) 7701(6) 37(1)

S(12) 1981(6) 4474(1) 13228(6) 37(1)

S(13) -659(6) 3592(1) 8588(7) 45(1)

S(14) 787(6) 3700(1) 13484(7) 45(1)

S(15) -893(8) 2983(1) 11517(9) 69(1)

S(16) 3559(6) 5261(1) 12691(6) 38(1)

S(17) 1974(6) 5151(1) 7178(6) 38(1)

S(18) 5042(6) 5978(1) 11968(7) 43(1)

S(19) 3638(6) 5879(1) 7048(7) 42(1)

S(20) 5617(7) 6566(1) 9137(9) 60(1)

C(11) 279(18) 4024(4) 9570(30) 33(3)

C(12) 1000(20) 4075(4) 11940(20) 33(3)

C(13) -300(30) 3396(4) 11230(30) 50(4)

C(14) 3823(19) 5565(4) 10920(30) 35(4)

C(15) 3160(20) 5530(4) 8580(20) 35(4)

C(16) 4810(20) 6171(4) 9400(30) 38(4)

Pd(2) 1851(2) 189(1) 10214(2) 31(1)

S(21) 1970(5) -144(1) 7116(6) 37(1)

S(22) 3587(5) -257(1) 12604(6) 38(1)

S(23) 3729(6) -872(1) 6780(7) 42(1)

S(24) 5151(6) -972(1) 11667(7) 41(1)

S(25) 5770(7) -1561(1) 8651(9) 59(1)

S(26) 1909(5) 534(1) 13351(6) 37(1)

S(27) 295(6) 660(1) 7861(6) 38(1)

S(28) 602(6) 1306(1) 13803(7) 47(1)

S(29) -848(6) 1412(1) 8923(7) 49(1)

S(30) -1167(8) 2023(1) 12012(10) 77(2)

C(21) 3250(20) -517(4) 8440(20) 33(3)

C(22) 3879(17) -567(4) 10710(20) 31(3)

C(23) 4890(20) -1159(4) 9020(30) 42(4)

C(24) 813(18) 929(4) 12120(20) 32(3)

C(25) 169(19) 981(4) 9830(20) 35(4)

C(26) -550(20) 1602(4) 11580(30) 48(4)

________________________________________________________________

Table S3. Bond lengths [A] and angles [deg] for (SMeEt2)[Pd(dmit)2]2 (**1**) at room temperature.

_____________________________________________________________

S(1)-C(1A) 1.692(19)

S(1)-C(1B) 1.777(18)

S(1)-C(2) 1.81(3)

S(1)-C(4) 1.82(3)

C(2)-C(3B) 1.52(2)

C(2)-C(3A) 1.51(2)

C(4)-C(5A) 1.50(2)

C(4)-C(5B) 1.50(2)

Pd(1)-S(16) 2.279(4)

Pd(1)-S(12) 2.287(4)

Pd(1)-S(17) 2.295(4)

Pd(1)-S(11) 2.297(4)

Pd(1)-Pd(1)#1 3.130(3)

S(11)-C(11) 1.694(15)

S(12)-C(12) 1.681(15)

S(13)-C(11) 1.736(14)

S(13)-C(13) 1.747(16)

S(14)-C(13) 1.724(17)

S(14)-C(12) 1.736(13)

S(15)-C(13) 1.610(17)

S(16)-C(14) 1.659(15)

S(17)-C(15) 1.697(16)

S(18)-C(16) 1.724(15)

S(18)-C(14) 1.760(15)

S(19)-C(15) 1.738(14)

S(19)-C(16) 1.751(16)

S(20)-C(16) 1.609(15)

C(11)-C(12) 1.39(2)

C(14)-C(15) 1.37(2)

Pd(2)-S(22) 2.285(4)

Pd(2)-S(26) 2.287(4)

Pd(2)-S(21) 2.290(4)

Pd(2)-S(27) 2.296(4)

Pd(2)-Pd(2)#2 3.139(3)

S(21)-C(21) 1.701(13)

S(22)-C(22) 1.684(14)

S(23)-C(23) 1.722(15)

S(23)-C(21) 1.754(12)

S(24)-C(23) 1.721(15)

S(24)-C(22) 1.740(14)

S(25)-C(23) 1.640(15)

S(26)-C(24) 1.701(14)

S(27)-C(25) 1.700(15)

S(28)-C(26) 1.733(17)

S(28)-C(24) 1.742(14)

S(29)-C(26) 1.723(18)

S(29)-C(25) 1.743(14)

S(30)-C(26) 1.633(16)

C(21)-C(22) 1.340(19)

C(24)-C(25) 1.35(2)

C(1A)-S(1)-C(1B) 43.6(17)

C(1A)-S(1)-C(2) 75.0(15)

C(1B)-S(1)-C(2) 104.3(15)

C(1A)-S(1)-C(4) 77.7(16)

C(1B)-S(1)-C(4) 102.7(15)

C(2)-S(1)-C(4) 101.4(13)

C(3B)-C(2)-C(3A) 24(6)

C(3B)-C(2)-S(1) 102(5)

C(3A)-C(2)-S(1) 113(4)

C(5A)-C(4)-C(5B) 30(3)

C(5A)-C(4)-S(1) 100(4)

C(5B)-C(4)-S(1) 111(3)

S(16)-Pd(1)-S(12) 89.12(14)

S(16)-Pd(1)-S(17) 89.73(14)

S(12)-Pd(1)-S(17) 176.37(16)

S(16)-Pd(1)-S(11) 176.11(15)

S(12)-Pd(1)-S(11) 90.01(14)

S(17)-Pd(1)-S(11) 90.91(14)

S(16)-Pd(1)-Pd(1)#1 92.50(12)

S(12)-Pd(1)-Pd(1)#1 91.55(12)

S(17)-Pd(1)-Pd(1)#1 91.94(12)

S(11)-Pd(1)-Pd(1)#1 91.31(12)

C(11)-S(11)-Pd(1) 101.0(5)

C(12)-S(12)-Pd(1) 102.3(5)

C(11)-S(13)-C(13) 98.7(8)

C(13)-S(14)-C(12) 99.4(8)

C(14)-S(16)-Pd(1) 101.4(6)

C(15)-S(17)-Pd(1) 101.5(5)

C(16)-S(18)-C(14) 99.3(7)

C(15)-S(19)-C(16) 97.3(7)

C(12)-C(11)-S(11) 124.0(11)

C(12)-C(11)-S(13) 115.4(11)

S(11)-C(11)-S(13) 120.5(9)

C(11)-C(12)-S(12) 122.5(10)

C(11)-C(12)-S(14) 115.0(11)

S(12)-C(12)-S(14) 122.5(8)

S(15)-C(13)-S(14) 124.6(10)

S(15)-C(13)-S(13) 123.9(10)

S(14)-C(13)-S(13) 111.5(9)

C(15)-C(14)-S(16) 125.6(12)

C(15)-C(14)-S(18) 113.4(11)

S(16)-C(14)-S(18) 121.0(9)

C(14)-C(15)-S(17) 121.8(11)

C(14)-C(15)-S(19) 117.9(12)

S(17)-C(15)-S(19) 120.3(8)

S(20)-C(16)-S(18) 125.1(10)

S(20)-C(16)-S(19) 122.9(9)

S(18)-C(16)-S(19) 111.9(8)

S(22)-Pd(2)-S(26) 89.42(14)

S(22)-Pd(2)-S(21) 89.87(14)

S(26)-Pd(2)-S(21) 176.55(15)

S(22)-Pd(2)-S(27) 175.97(16)

S(26)-Pd(2)-S(27) 89.98(14)

S(21)-Pd(2)-S(27) 90.49(13)

S(22)-Pd(2)-Pd(2)#2 91.84(12)

S(26)-Pd(2)-Pd(2)#2 91.68(12)

S(21)-Pd(2)-Pd(2)#2 91.71(12)

S(27)-Pd(2)-Pd(2)#2 92.16(12)

C(21)-S(21)-Pd(2) 100.7(5)

C(22)-S(22)-Pd(2) 101.4(5)

C(23)-S(23)-C(21) 96.7(7)

C(23)-S(24)-C(22) 97.5(7)

C(24)-S(26)-Pd(2) 101.8(5)

C(25)-S(27)-Pd(2) 100.9(5)

C(26)-S(28)-C(24) 97.5(7)

C(26)-S(29)-C(25) 98.0(7)

C(22)-C(21)-S(21) 124.0(10)

C(22)-C(21)-S(23) 116.5(10)

S(21)-C(21)-S(23) 119.4(8)

C(21)-C(22)-S(22) 123.9(11)

C(21)-C(22)-S(24) 115.7(10)

S(22)-C(22)-S(24) 120.4(8)

S(25)-C(23)-S(24) 123.6(9)

S(25)-C(23)-S(23) 122.9(9)

S(24)-C(23)-S(23) 113.4(8)

C(25)-C(24)-S(26) 122.8(11)

C(25)-C(24)-S(28) 116.1(11)

S(26)-C(24)-S(28) 120.9(9)

C(24)-C(25)-S(27) 124.5(11)

C(24)-C(25)-S(29) 115.7(11)

S(27)-C(25)-S(29) 119.8(8)

S(30)-C(26)-S(29) 124.3(11)

S(30)-C(26)-S(28) 123.0(11)

S(29)-C(26)-S(28) 112.6(9)

_____________________________________________________________

Symmetry transformations used to generate equivalent atoms:

#1 -x,-y+1,-z+2 #2 -x,-y,-z+2

Table S4. Anisotropic displacement parameters (A^2 x 10^3) for (SMeEt2)[Pd(dmit)2]2 (**1**) at room temperature.

The anisotropic displacement factor exponent takes the form:

-2 pi^2 [ h^2 a*^2 U11 + ... + 2 h k a* b* U12 ]

_______________________________________________________________________

U11 U22 U33 U23 U13 U12

_______________________________________________________________________

S(1) 100(5) 132(6) 79(4) 2(4) 27(4) -1(4)

C(1A) 40(20) 180(30) 18(11) 60(11) 12(12) -9(16)

C(1B) 28(18) 161(15) 12(15) -33(16) 4(15) -53(16)

C(2) 120(20) 170(20) 97(19) 17(15) 34(17) -27(18)

C(3A) 100(30) 150(50) 120(40) 50(40) 30(30) -10(30)

C(3B) 150(50) 230(60) 110(40) 30(40) 60(30) -10(40)

C(4) 98(12) 150(20) 86(17) 0(15) 30(14) -2(15)

C(5A) 110(40) 160(40) 100(40) 20(30) 50(30) 40(30)

C(5B) 70(30) 150(40) 70(30) 30(30) 0(30) 10(30)

Pd(1) 32(1) 32(1) 29(1) 2(1) 11(1) -3(1)

S(11) 40(2) 38(2) 32(2) 0(2) 12(2) -8(2)

S(12) 45(2) 35(2) 31(2) 1(2) 12(2) -9(2)

S(13) 50(3) 36(2) 46(2) -1(2) 14(2) -6(2)

S(14) 58(3) 37(2) 43(2) 7(2) 23(2) -5(2)

S(15) 86(4) 40(2) 78(3) 9(2) 26(3) -18(2)

S(16) 39(2) 41(2) 33(2) 3(2) 9(2) -8(2)

S(17) 47(3) 35(2) 32(2) 1(2) 15(2) -10(2)

S(18) 41(2) 40(2) 40(2) -2(2) 9(2) -8(2)

S(19) 47(3) 42(2) 39(2) 4(2) 18(2) -8(2)

S(20) 62(3) 40(2) 79(3) 4(2) 28(3) -14(2)

C(11) 11(7) 40(8) 48(10) -11(7) 12(7) -8(6)

C(12) 35(9) 34(8) 36(9) 15(6) 21(7) 10(7)

C(13) 68(12) 36(9) 53(10) 2(7) 32(10) 7(8)

C(14) 16(8) 43(9) 49(10) 8(7) 15(7) 2(6)

C(15) 37(9) 37(8) 40(9) 6(7) 24(8) 2(7)

C(16) 27(9) 37(8) 48(9) 8(7) 10(8) -9(7)

Pd(2) 29(1) 33(1) 31(1) 1(1) 11(1) 5(1)

S(21) 40(2) 38(2) 32(2) 3(2) 13(2) 11(2)

S(22) 39(2) 42(2) 31(2) -2(2) 10(2) 6(2)

S(23) 46(3) 42(2) 42(2) -1(2) 21(2) 11(2)

S(24) 38(2) 42(2) 38(2) 3(2) 9(2) 8(2)

S(25) 63(3) 42(2) 74(3) -3(2) 29(3) 16(2)

S(26) 34(2) 40(2) 34(2) 1(2) 10(2) 6(2)

S(27) 41(2) 39(2) 34(2) 1(2) 14(2) 6(2)

S(28) 55(3) 37(2) 56(3) -9(2) 28(2) 2(2)

S(29) 48(3) 37(2) 55(3) 4(2) 13(2) 8(2)

S(30) 87(4) 41(3) 101(4) -9(3) 37(3) 14(3)

C(21) 34(9) 32(8) 34(9) -4(6) 14(7) 13(7)

C(22) 8(7) 51(9) 32(8) 4(6) 5(6) 0(6)

C(23) 45(10) 36(9) 42(9) 1(7) 14(8) 3(7)

C(24) 16(7) 38(8) 43(9) 0(6) 15(7) 7(6)

C(25) 16(8) 44(9) 38(9) 10(7) 4(7) 12(7)

C(26) 31(9) 43(9) 73(12) 0(8) 21(9) -2(7)

_______________________________________________________________________

Table S5. Hydrogen coordinates ( x 10^4) and isotropic

displacement parameters (A^2 x 10^3) for (SMeEt2)[Pd(dmit)2]2 (**1**) at room temperature.

________________________________________________________________

x y z U(eq)

________________________________________________________________

H(1A1) 3891 2411 4002 118

H(1A2) 2082 2404 4532 118

H(1A3) 3459 2066 5168 118

H(1B1) 3151 2023 5449 103

H(1B2) 4911 1900 7535 103

H(1B3) 5126 2080 5411 103

H(2A) 3778 2818 4224 156

H(2B) 4854 3090 6256 156

H(3A1) 7624 2854 6519 190

H(3A2) 6513 2877 3865 190

H(3A3) 6737 2497 5087 190

H(3B1) 6244 2370 5351 236

H(3B2) 7300 2733 5330 236

H(3B3) 5604 2611 3145 236

H(4A) 1851 2881 7321 135

H(4B) 1265 2511 5835 135

H(5A1) 1138 2230 8789 182

H(5A2) 1637 2601 10230 182

H(5A3) 3213 2328 10198 182

H(5B1) 2352 2186 9357 160

H(5B2) 635 2152 7041 160

H(5B3) 575 2427 8988 160

________________________________________________________________

Table S6. Crystal data and structure refinement for (SMeEt2)[Pd(dmit)2]2 (**1**) at 160 K

Identification code (SMeEt2)[Pd(dmit)2]2 (**1**)

Empirical formula C17 H13 Pd2 S21

Formula weight 1103.58

Temperature 160(2) K

Wavelength 0.71073 A

Crystal system, space group Triclinic, P-1

Unit cell dimensions a = 7.7888(9) A alpha = 92.112(11) deg.

b = 36.181(3) A beta = 112.169(12) deg.

c = 6.2573(6) A gamma = 88.740(12) deg.

Volume 1631.8(3) A^3

Z, Calculated density 2, 2.246 Mg/m^3

Absorption coefficient 2.463 mm^-1

F(000) 1086

Crystal size 0.5 x 0.35 x 0.05 mm

Theta range for data collection 2.82 to 21.03 deg.

Limiting indices -7<=h<=7, -33<=k<=35, 0<=l<=6

Reflections collected / unique 9065 / 3336 [R(int) = 0.0585]

Completeness to theta = 21.03 95.2 %

Absorption correction Empirical (DIFABS)

Max. and min. transmission 0.5464 and 0.2078

Refinement method Full-matrix least-squares on F^2

Data / restraints / parameters 3336 / 22 / 364

Goodness-of-fit on F^2 1.175

Final R indices [I>2sigma(I)] R1 = 0.0861, wR2 = 0.2233

R indices (all data) R1 = 0.0962, wR2 = 0.2292

Largest diff. peak and hole 1.757 and -0.984 e.A^-3

Table S7. Atomic coordinates ( x 10^4) and equivalent isotropic

displacement parameters (A^2 x 10^3) for (SMeEt2)[Pd(dmit)2]2 (**1**) at 160 K

U(eq) is defined as one third of the trace of the orthogonalized

Uij tensor.

________________________________________________________________

x y z U(eq)

________________________________________________________________

S(1) 4437(12) 2531(3) 7689(15) 91(2)

C(1) 4330(60) 2097(11) 6330(70) 132(14)

C(2) 4720(50) 2843(12) 5580(60) 114(10)

C(3) 6390(50) 2717(12) 5050(60) 123(13)

C(4) 2080(40) 2623(10) 7280(60) 96(8)

C(5) 1500(50) 2360(11) 8730(60) 110(11)

Pd(1) 1882(2) 4816(1) 10166(3) 47(1)

S(11) 361(8) 4343(2) 7638(10) 49(2)

S(12) 1991(8) 4474(2) 13227(10) 49(2)

S(13) -697(9) 3588(2) 8493(11) 56(2)

S(14) 774(9) 3697(2) 13461(11) 58(2)

S(15) -942(10) 2980(2) 11453(12) 70(2)

S(16) 3583(9) 5266(2) 12734(10) 51(2)

S(17) 1977(8) 5146(2) 7164(10) 49(2)

S(18) 5077(9) 5982(2) 12049(10) 54(2)

S(19) 3661(9) 5883(2) 7070(11) 54(2)

S(20) 5637(10) 6575(2) 9209(12) 65(2)

C(11) 300(30) 4007(6) 9550(40) 38(5)

C(12) 960(30) 4074(6) 11830(40) 49(6)

C(13) -300(30) 3398(6) 11180(40) 49(6)

C(14) 3860(30) 5581(6) 10810(50) 53(7)

C(15) 3150(30) 5535(6) 8580(40) 37(5)

C(16) 4790(30) 6174(7) 9410(40) 53(6)

Pd(2) 1850(2) 191(1) 10218(3) 48(1)

S(21) 1973(8) -142(2) 7086(10) 50(2)

S(22) 3596(9) -257(2) 12625(10) 51(2)

S(23) 3748(9) -875(2) 6712(10) 53(2)

S(24) 5180(9) -976(2) 11650(10) 54(2)

S(25) 5795(10) -1564(2) 8587(12) 66(2)

S(26) 1911(8) 537(2) 13405(10) 51(2)

S(27) 286(8) 661(2) 7857(10) 50(2)

S(28) 567(9) 1311(2) 13876(11) 57(2)

S(29) -903(9) 1415(2) 8924(11) 59(2)

S(30) -1233(11) 2026(2) 12088(14) 72(2)

C(21) 3210(30) -528(6) 8390(40) 43(6)

C(22) 3910(30) -578(7) 10590(50) 55(6)

C(23) 4920(30) -1168(7) 8920(40) 58(7)

C(24) 830(30) 937(6) 12130(50) 55(7)

C(25) 160(30) 990(6) 9830(40) 43(6)

C(26) -540(30) 1613(7) 11710(40) 56(6)

________________________________________________________________

Table S8. Bond lengths [A] and angles [deg] for (SMeEt2)[Pd(dmit)2]2 (**1**) at 160 K

_____________________________________________________________

S(1)-C(1) 1.74(3)

S(1)-C(4) 1.78(3)

S(1)-C(2) 1.85(4)

C(2)-C(3) 1.52(5)

C(4)-C(5) 1.53(4)

Pd(1)-S(17) 2.289(6)

Pd(1)-S(12) 2.291(6)

Pd(1)-S(16) 2.299(6)

Pd(1)-S(11) 2.303(6)

Pd(1)-Pd(1)#1 3.132(4)

S(11)-C(11) 1.75(2)

S(12)-C(12) 1.71(2)

S(13)-C(11) 1.71(2)

S(13)-C(13) 1.75(2)

S(14)-C(13) 1.71(2)

S(14)-C(12) 1.77(2)

S(15)-C(13) 1.64(2)

S(16)-C(14) 1.76(2)

S(17)-C(15) 1.72(2)

S(18)-C(14) 1.74(2)

S(18)-C(16) 1.75(2)

S(19)-C(16) 1.72(2)

S(19)-C(15) 1.74(2)

S(20)-C(16) 1.63(3)

C(11)-C(12) 1.34(3)

C(14)-C(15) 1.30(3)

Pd(2)-S(21) 2.295(6)

Pd(2)-S(22) 2.299(6)

Pd(2)-S(26) 2.300(6)

Pd(2)-S(27) 2.301(6)

Pd(2)-Pd(2)#2 3.138(4)

S(21)-C(21) 1.72(2)

S(22)-C(22) 1.77(3)

S(23)-C(23) 1.73(3)

S(23)-C(21) 1.75(2)

S(24)-C(22) 1.73(3)

S(24)-C(23) 1.76(2)

S(25)-C(23) 1.61(3)

S(26)-C(24) 1.72(3)

S(27)-C(25) 1.71(2)

S(28)-C(26) 1.72(3)

S(28)-C(24) 1.76(2)

S(29)-C(25) 1.74(2)

S(29)-C(26) 1.78(2)

S(30)-C(26) 1.62(3)

C(21)-C(22) 1.30(3)

C(24)-C(25) 1.35(3)

C(1)-S(1)-C(4) 102.9(17)

C(1)-S(1)-C(2) 102(2)

C(4)-S(1)-C(2) 100.4(17)

C(3)-C(2)-S(1) 109(3)

C(5)-C(4)-S(1) 109(2)

S(17)-Pd(1)-S(12) 176.1(2)

S(17)-Pd(1)-S(16) 90.0(2)

S(12)-Pd(1)-S(16) 89.0(2)

S(17)-Pd(1)-S(11) 90.4(2)

S(12)-Pd(1)-S(11) 90.4(2)

S(16)-Pd(1)-S(11) 176.1(2)

S(17)-Pd(1)-Pd(1)#1 92.19(18)

S(12)-Pd(1)-Pd(1)#1 91.57(17)

S(16)-Pd(1)-Pd(1)#1 92.35(18)

S(11)-Pd(1)-Pd(1)#1 91.47(17)

C(11)-S(11)-Pd(1) 101.3(7)

C(12)-S(12)-Pd(1) 100.9(9)

C(11)-S(13)-C(13) 96.5(11)

C(13)-S(14)-C(12) 97.2(12)

C(14)-S(16)-Pd(1) 100.4(9)

C(15)-S(17)-Pd(1) 101.7(7)

C(14)-S(18)-C(16) 94.6(12)

C(16)-S(19)-C(15) 97.5(11)

C(12)-C(11)-S(13) 118.6(17)

C(12)-C(11)-S(11) 121.5(17)

S(13)-C(11)-S(11) 119.9(12)

C(11)-C(12)-S(12) 125.9(18)

C(11)-C(12)-S(14) 114.4(17)

S(12)-C(12)-S(14) 119.7(15)

S(15)-C(13)-S(14) 123.8(14)

S(15)-C(13)-S(13) 122.9(13)

S(14)-C(13)-S(13) 113.3(13)

C(15)-C(14)-S(18) 120.1(18)

C(15)-C(14)-S(16) 123.6(18)

S(18)-C(14)-S(16) 116.2(16)

C(14)-C(15)-S(17) 124.2(17)

C(14)-C(15)-S(19) 114.5(17)

S(17)-C(15)-S(19) 121.0(12)

S(20)-C(16)-S(19) 123.9(15)

S(20)-C(16)-S(18) 123.0(14)

S(19)-C(16)-S(18) 113.0(14)

S(21)-Pd(2)-S(22) 90.1(2)

S(21)-Pd(2)-S(26) 176.4(2)

S(22)-Pd(2)-S(26) 89.2(2)

S(21)-Pd(2)-S(27) 90.3(2)

S(22)-Pd(2)-S(27) 176.1(2)

S(26)-Pd(2)-S(27) 90.2(2)

S(21)-Pd(2)-Pd(2)#2 91.87(18)

S(22)-Pd(2)-Pd(2)#2 91.50(18)

S(26)-Pd(2)-Pd(2)#2 91.63(17)

S(27)-Pd(2)-Pd(2)#2 92.38(17)

C(21)-S(21)-Pd(2) 101.2(7)

C(22)-S(22)-Pd(2) 100.7(9)

C(23)-S(23)-C(21) 97.6(12)

C(22)-S(24)-C(23) 95.2(13)

C(24)-S(26)-Pd(2) 100.8(9)

C(25)-S(27)-Pd(2) 101.5(8)

C(26)-S(28)-C(24) 98.0(13)

C(25)-S(29)-C(26) 97.2(12)

C(22)-C(21)-S(21) 125.3(17)

C(22)-C(21)-S(23) 114.7(19)

S(21)-C(21)-S(23) 119.8(13)

C(21)-C(22)-S(24) 119.9(19)

C(21)-C(22)-S(22) 123(2)

S(24)-C(22)-S(22) 117.4(15)

S(25)-C(23)-S(23) 124.9(15)

S(25)-C(23)-S(24) 122.8(16)

S(23)-C(23)-S(24) 112.3(14)

C(25)-C(24)-S(26) 124.3(18)

C(25)-C(24)-S(28) 116.1(19)

S(26)-C(24)-S(28) 119.6(17)

C(24)-C(25)-S(27) 123.2(18)

C(24)-C(25)-S(29) 116.6(18)

S(27)-C(25)-S(29) 120.3(13)

S(30)-C(26)-S(28) 125.2(15)

S(30)-C(26)-S(29) 122.6(15)

S(28)-C(26)-S(29) 112.1(14)

_____________________________________________________________

Symmetry transformations used to generate equivalent atoms:

#1 -x,-y+1,-z+2 #2 -x,-y,-z+2

Table S9. Anisotropic displacement parameters (A^2 x 10^3) for (SMeEt2)[Pd(dmit)2]2 (**1**) at 160 K

The anisotropic displacement factor exponent takes the form:

-2 pi^2 [ h^2 a*^2 U11 + ... + 2 h k a* b* U12 ]

_______________________________________________________________________

U11 U22 U33 U23 U13 U12

_______________________________________________________________________

S(1) 84(5) 97(7) 85(5) 0(4) 23(4) -3(5)

C(1) 140(30) 143(18) 160(40) -70(20) 120(30) -40(20)

C(2) 90(20) 170(30) 80(20) 26(18) 27(17) 0(20)

C(3) 120(30) 170(40) 80(20) 50(20) 43(19) 30(20)

C(4) 86(13) 100(20) 100(20) -11(17) 38(17) -10(16)

C(5) 86(19) 130(30) 110(30) 30(20) 33(19) 10(20)

Pd(1) 46(1) 51(1) 45(1) 2(1) 16(1) -3(1)

S(11) 50(4) 50(4) 46(3) -1(3) 17(3) -5(3)

S(12) 46(4) 52(4) 47(3) -2(3) 15(3) -5(3)

S(13) 54(4) 52(4) 56(4) 3(3) 15(3) -5(3)

S(14) 65(4) 53(4) 55(4) 8(3) 23(3) -1(3)

S(15) 77(5) 56(5) 73(5) 7(3) 25(4) -10(4)

S(16) 56(4) 53(4) 41(3) 4(3) 13(3) -3(3)

S(17) 50(4) 49(4) 46(3) 0(3) 16(3) -5(3)

S(18) 50(4) 53(4) 55(4) -1(3) 14(3) -7(3)

S(19) 54(4) 48(4) 61(4) 6(3) 23(3) -4(3)

S(20) 66(4) 54(5) 75(4) 4(3) 26(4) -9(3)

C(11) 35(12) 39(14) 42(13) -6(10) 18(10) 2(10)

C(12) 33(13) 40(15) 80(19) 8(12) 29(13) 16(10)

C(13) 49(14) 39(15) 47(13) 0(10) 5(11) 7(11)

C(14) 41(14) 25(14) 100(20) 20(12) 29(14) 14(10)

C(15) 45(13) 33(14) 40(13) 7(10) 25(11) 2(10)

C(16) 42(14) 63(17) 56(15) -2(12) 20(12) -7(12)

Pd(2) 46(1) 49(1) 48(1) 1(1) 18(1) 2(1)

S(21) 53(4) 46(4) 50(3) 4(3) 18(3) 6(3)

S(22) 54(4) 55(4) 40(3) 2(3) 14(3) 4(3)

S(23) 54(4) 50(4) 57(4) -1(3) 25(3) 10(3)

S(24) 52(4) 58(4) 52(4) 6(3) 18(3) 9(3)

S(25) 66(4) 59(5) 75(4) 1(3) 30(4) 9(3)

S(26) 48(4) 53(4) 51(4) 4(3) 17(3) 4(3)

S(27) 49(4) 52(4) 50(3) 5(3) 20(3) 2(3)

S(28) 60(4) 53(4) 61(4) -5(3) 25(3) -1(3)

S(29) 53(4) 53(4) 66(4) 2(3) 19(3) 6(3)

S(30) 76(5) 51(5) 94(5) -1(4) 37(4) 9(4)

C(21) 54(15) 33(14) 49(15) -16(10) 30(12) 1(10)

C(22) 40(14) 61(18) 72(19) -2(13) 31(13) 4(12)

C(23) 48(15) 66(18) 61(16) -12(13) 23(13) -8(13)

C(24) 33(13) 37(15) 110(20) -11(13) 45(14) -11(11)

C(25) 44(14) 38(15) 48(14) 19(11) 16(11) -8(10)

C(26) 48(15) 58(17) 65(16) 2(12) 23(13) -3(12)

_______________________________________________________________________

Table S10. Hydrogen coordinates ( x 10^4) and isotropic

displacement parameters (A^2 x 10^3) for (SMeEt2)[Pd(dmit)2]2 (**1**) at 160 K

________________________________________________________________

x y z U(eq)

________________________________________________________________

H(1A) 3994 1911 7204 197

H(1B) 5542 2034 6275 197

H(1C) 3394 2102 4760 197

H(2A) 3594 2838 4141 137

H(2B) 4896 3100 6218 137

H(3A) 7371 2634 6473 184

H(3B) 6846 2924 4449 184

H(3C) 6039 2513 3903 184

H(4A) 1940 2883 7749 115

H(4B) 1282 2587 5625 115

H(5A) 2535 2191 9507 165

H(5B) 429 2217 7729 165

H(5C) 1180 2502 9888 165

________________________________________________________________

Table S11. Crystal data and structure refinement for (SMeEt2)0.5[Pd(dmit)2] (**2**) at 160 K

.

Identification code (SMeEt2)0.5[Pd(dmit)2] (**2**)

Empirical formula C17 H13 Pd2 S21

Formula weight 1103.58

Temperature 160(2) K

Wavelength 0.71073 A

Crystal system, space group Triclinic, P-1

Unit cell dimensions a = 7.7877(12) A alpha = 96.80(2) deg.

b = 18.323(3) A beta = 112.257(18) deg.

c = 6.2846(10) A gamma = 84.17(2) deg.

Volume 822.5(2) A^3

Z, Calculated density 1, 2.228 Mg/m^3

Absorption coefficient 2.443 mm^-1

F(000) 543

Crystal size 0.4 x 0.35 x 0.05 mm

Theta range for data collection 2.24 to 24.08 deg.

Limiting indices -8<=h<=8, -21<=k<=20, -7<=l<=7

Reflections collected / unique 6587 / 2415 [R(int) = 0.0420]

Completeness to theta = 24.08 93.0 %

Absorption correction Empirical (DIFABS)

Max. and min. transmission 1.1389 and 0.5385

Refinement method Full-matrix least-squares on F^2

Data / restraints / parameters 2415 / 30 / 208

Goodness-of-fit on F^2 1.110

Final R indices [I>2sigma(I)] R1 = 0.0346, wR2 = 0.0925

R indices (all data) R1 = 0.0368, wR2 = 0.0939

Largest diff. peak and hole 0.901 and -1.198 e.A^-3

Table S12. Atomic coordinates ( x 10^4) and equivalent isotropic

displacement parameters (A^2 x 10^3) for (SMeEt2)0.5[Pd(dmit)2] (**2**) at 160 K .

U(eq) is defined as one third of the trace of the orthogonalized

Uij tensor.

________________________________________________________________

x y z U(eq)

________________________________________________________________

Pd(1) 1926(1) 4629(1) 5068(1) 20(1)

S(11) 1935(2) 5291(1) 2189(2) 25(1)

S(12) 3511(2) 5525(1) 7780(2) 26(1)

S(13) 3415(2) 6750(1) 2332(2) 29(1)

S(14) 4789(2) 6960(1) 7314(2) 30(1)

S(15) 5167(2) 8132(1) 4658(3) 45(1)

S(16) 2104(2) 3941(1) 7987(2) 24(1)

S(17) 540(2) 3690(1) 2366(2) 25(1)

S(18) 1073(2) 2398(1) 7874(2) 31(1)

S(19) -302(2) 2181(1) 2906(2) 33(1)

S(20) -342(3) 952(1) 5572(3) 56(1)

C(11) 3036(7) 6044(2) 3713(8) 22(1)

C(12) 3694(6) 6144(2) 6090(8) 22(1)

C(13) 4474(7) 7324(3) 4763(9) 30(1)

C(14) 1186(7) 3148(2) 6461(8) 24(1)

C(15) 538(7) 3044(2) 4101(8) 23(1)

C(16) 126(8) 1799(3) 5449(10) 36(1)

S(1) 5569(7) -3(3) 1224(6) 81(1)

C(1) 5060(30) -920(9) -50(30) 76(4)

C(2) 6550(50) 320(9) -690(40) 129(8)

C(3) 7170(50) -210(13) -2340(50) 179(15)

C(4) 3690(40) 521(16) 610(50) 150(9)

C(5) 2410(40) 50(30) 1110(50) 227(19)

________________________________________________________________

Table S13. Bond lengths [A] and angles [deg] for (SMeEt2)0.5[Pd(dmit)2] (**2**) at 160 K .

_____________________________________________________________

Pd(1)-S(11) 2.2966(12)

Pd(1)-S(12) 2.2966(14)

Pd(1)-S(16) 2.3012(12)

Pd(1)-S(17) 2.3043(13)

Pd(1)-Pd(1)#1 3.1397(9)

S(11)-C(11) 1.692(5)

S(12)-C(12) 1.693(5)

S(13)-C(13) 1.721(5)

S(13)-C(11) 1.746(4)

S(14)-C(13) 1.732(5)

S(14)-C(12) 1.745(5)

S(15)-C(13) 1.643(5)

S(16)-C(14) 1.704(5)

S(17)-C(15) 1.702(5)

S(18)-C(16) 1.729(6)

S(18)-C(14) 1.748(4)

S(19)-C(16) 1.723(5)

S(19)-C(15) 1.746(4)

S(20)-C(16) 1.646(5)

C(11)-C(12) 1.379(7)

C(14)-C(15) 1.370(7)

S(1)-C(4) 1.61(3)

S(1)-C(1) 1.789(18)

S(1)-C(2) 1.831(15)

C(2)-C(3) 1.509(18)

C(4)-C(5) 1.52(5)

S(11)-Pd(1)-S(12) 89.84(4)

S(11)-Pd(1)-S(16) 176.46(4)

S(12)-Pd(1)-S(16) 89.52(4)

S(11)-Pd(1)-S(17) 90.18(4)

S(12)-Pd(1)-S(17) 175.89(4)

S(16)-Pd(1)-S(17) 90.21(4)

S(11)-Pd(1)-Pd(1)#1 92.70(4)

S(12)-Pd(1)-Pd(1)#1 91.83(4)

S(16)-Pd(1)-Pd(1)#1 90.80(4)

S(17)-Pd(1)-Pd(1)#1 92.27(4)

C(11)-S(11)-Pd(1) 101.82(16)

C(12)-S(12)-Pd(1) 101.48(16)

C(13)-S(13)-C(11) 97.5(2)

C(13)-S(14)-C(12) 97.4(2)

C(14)-S(16)-Pd(1) 101.26(16)

C(15)-S(17)-Pd(1) 100.97(16)

C(16)-S(18)-C(14) 97.5(2)

C(16)-S(19)-C(15) 97.8(2)

C(12)-C(11)-S(11) 123.1(3)

C(12)-C(11)-S(13) 115.7(3)

S(11)-C(11)-S(13) 121.2(3)

C(11)-C(12)-S(12) 123.7(3)

C(11)-C(12)-S(14) 115.6(3)

S(12)-C(12)-S(14) 120.7(3)

S(15)-C(13)-S(13) 122.8(3)

S(15)-C(13)-S(14) 123.4(3)

S(13)-C(13)-S(14) 113.7(3)

C(15)-C(14)-S(16) 123.4(3)

C(15)-C(14)-S(18) 115.8(4)

S(16)-C(14)-S(18) 120.8(3)

C(14)-C(15)-S(17) 124.1(4)

C(14)-C(15)-S(19) 115.6(3)

S(17)-C(15)-S(19) 120.3(3)

S(20)-C(16)-S(19) 123.6(3)

S(20)-C(16)-S(18) 123.1(3)

S(19)-C(16)-S(18) 113.3(3)

C(4)-S(1)-C(1) 110.3(13)

C(4)-S(1)-C(2) 99.7(15)

C(1)-S(1)-C(2) 100.9(7)

C(3)-C(2)-S(1) 121.4(13)

C(5)-C(4)-S(1) 101(3)

_____________________________________________________________

Symmetry transformations used to generate equivalent atoms:

#1 -x,-y+1,-z+1

Table S14. Anisotropic displacement parameters (A^2 x 10^3) for (SMeEt2)0.5[Pd(dmit)2] (**2**) at 160 K

The anisotropic displacement factor exponent takes the form:

-2 pi^2 [ h^2 a*^2 U11 + ... + 2 h k a* b* U12 ]

_______________________________________________________________________

U11 U22 U33 U23 U13 U12

_______________________________________________________________________

Pd(1) 22(1) 20(1) 18(1) 1(1) 5(1) -3(1)

S(11) 33(1) 23(1) 18(1) 1(1) 7(1) -7(1)

S(12) 30(1) 25(1) 19(1) 1(1) 4(1) -7(1)

S(13) 33(1) 27(1) 29(1) 5(1) 11(1) -7(1)

S(14) 31(1) 27(1) 29(1) -1(1) 5(1) -10(1)

S(15) 46(1) 29(1) 60(1) 7(1) 16(1) -12(1)

S(16) 28(1) 23(1) 20(1) 2(1) 7(1) -4(1)

S(17) 30(1) 23(1) 20(1) 0(1) 7(1) -6(1)

S(18) 40(1) 24(1) 34(1) 7(1) 16(1) -3(1)

S(19) 36(1) 23(1) 34(1) -1(1) 7(1) -7(1)

S(20) 71(1) 28(1) 64(1) 8(1) 17(1) -16(1)

C(11) 19(3) 19(2) 27(2) 5(2) 8(2) -2(2)

C(12) 15(3) 21(2) 27(2) -2(2) 4(2) -2(2)

C(13) 22(3) 29(3) 35(3) 3(2) 7(2) 1(2)

C(14) 22(3) 24(2) 29(2) 8(2) 10(2) 2(2)

C(15) 20(3) 18(2) 30(2) -1(2) 8(2) -2(2)

C(16) 33(3) 27(3) 43(3) 6(2) 9(3) -3(2)

S(1) 80(3) 104(3) 34(2) 0(2) -2(2) 10(2)

C(1) 88(13) 91(8) 68(9) 32(7) 42(9) -14(8)

C(2) 250(30) 57(10) 94(15) 16(9) 66(17) -34(12)

C(3) 340(40) 148(18) 130(20) -83(16) 160(20) -190(20)

C(4) 140(17) 140(16) 112(16) -6(15) 1(14) 47(13)

C(5) 66(14) 490(60) 77(19) 20(30) -32(16) -60(20)

_______________________________________________________________________

Table S15. Hydrogen coordinates ( x 10^4) and isotropic

displacement parameters (A^2 x 10^3) for (SMeEt2)0.5[Pd(dmit)2] (**2**) at 160 K .

________________________________________________________________

x y z U(eq)

________________________________________________________________

H(1A) 6223 -1225 242 91

H(1B) 4388 -911 -1721 91

H(1C) 4290 -1128 621 91

H(2A) 5622 680 -1635 154

H(2B) 7645 598 297 154

H(3A) 7760 59 -3105 215

H(3B) 6084 -444 -3494 215

H(3C) 8056 -588 -1474 215

H(4A) 3881 989 1604 180

H(4B) 3190 628 -1031 180

H(5A) 1156 284 635 272

H(5B) 2883 -15 2763 272

H(5C) 2376 -438 244 272

________________________________________________________________

Table S16. Crystal data and structure refinement for (SMeEt2)0.5[Pd(dmit)2] (**2**) at room temperature

Identification code (SMeEt2)0.5[Pd(dmit)2] (**2**)

Empirical formula C17 H13 Pd2 S21

Formula weight 1103.58

Temperature 293(2) K

Wavelength 0.71069 A

Crystal system, space group Triclinic, P -1

Unit cell dimensions a = 7.844(5) A alpha = 97.654(5) deg.

b = 18.397(5) A beta = 112.076(5) deg.

c = 6.320(5) A gamma = 83.572(5) deg.

Volume 835.7(9) A^3

Z, Calculated density 1, 2.193 Mg/m^3

Absorption coefficient 2.405 mm^-1

F(000) 543

Crystal size 0.30 x 0.25 x 0.05 mm

Theta range for data collection 1.12 to 29.96 deg.

Limiting indices -11<=h<=10, -25<=k<=25, 0<=l<=8

Reflections collected / unique 4847 / 4847 [R(int) = 0.0000]

Completeness to theta = 29.96 100.0 %

Absorption correction Psi-scan

Max. and min. transmission 0.8863 and 0.5886

Refinement method Full-matrix least-squares on F^2

Data / restraints / parameters 4847 / 30 / 208

Goodness-of-fit on F^2 1.020

Final R indices [I>2sigma(I)] R1 = 0.0312, wR2 = 0.0702

R indices (all data) R1 = 0.0570, wR2 = 0.0790

Largest diff. peak and hole 0.556 and -0.884 e.A^-3

Table S17. Atomic coordinates ( x 10^4) and equivalent isotropic

displacement parameters (A^2 x 10^3) for (SMeEt2)0.5[Pd(dmit)2] (**2**) at .room temperature

U(eq) is defined as one third of the trace of the orthogonalized

Uij tensor.

________________________________________________________________

x y z U(eq)

________________________________________________________________

Pd(1) 1929(1) 4631(1) 5058(1) 29(1)

S(11) 1928(1) 5294(1) 2227(1) 36(1)

S(12) 3489(1) 5524(1) 7784(1) 37(1)

S(13) 3384(1) 6747(1) 2429(1) 41(1)

S(14) 4750(1) 6954(1) 7381(1) 43(1)

S(15) 5122(2) 8125(1) 4796(2) 63(1)

S(16) 2111(1) 3945(1) 7931(1) 35(1)

S(17) 564(1) 3694(1) 2342(1) 36(1)

S(18) 1120(1) 2405(1) 7764(2) 44(1)

S(19) -246(1) 2186(1) 2822(2) 47(1)

S(20) -275(2) 963(1) 5429(2) 78(1)

C(11) 3019(4) 6042(2) 3765(5) 31(1)

C(12) 3673(4) 6142(1) 6134(5) 30(1)

C(13) 4440(4) 7317(2) 4868(6) 40(1)

C(14) 1221(4) 3151(2) 6391(5) 32(1)

C(15) 564(4) 3051(2) 4036(5) 33(1)

C(16) 186(5) 1810(2) 5344(6) 47(1)

S(1) 5557(5) 55(2) 1207(5) 101(1)

C(1) 5150(20) -941(8) 110(30) 122(5)

C(2) 5960(40) 449(12) -630(40) 183(7)

C(3) 7590(30) 113(18) -1090(40) 227(14)

C(4) 3270(20) 385(10) 580(30) 151(6)

C(5) 2960(40) 91(15) 2420(40) 220(12)

________________________________________________________________

Table S18. Bond lengths [A] and angles [deg] for (SMeEt2)0.5[Pd(dmit)2] (**2**) at .room temperature

.

_____________________________________________________________

Pd(1)-S(11) 2.2954(14)

Pd(1)-S(12) 2.2965(11)

Pd(1)-S(16) 2.2990(14)

Pd(1)-S(17) 2.3044(11)

Pd(1)-Pd(1)#1 3.1534(18)

S(11)-C(11) 1.689(3)

S(12)-C(12) 1.694(3)

S(13)-C(13) 1.722(3)

S(13)-C(11) 1.741(3)

S(14)-C(13) 1.726(4)

S(14)-C(12) 1.742(3)

S(15)-C(13) 1.647(3)

S(16)-C(14) 1.706(3)

S(17)-C(15) 1.698(3)

S(18)-C(16) 1.722(4)

S(18)-C(14) 1.742(3)

S(19)-C(16) 1.723(4)

S(19)-C(15) 1.749(3)

S(20)-C(16) 1.652(3)

C(11)-C(12) 1.382(4)

C(14)-C(15) 1.373(4)

S(1)-C(2) 1.587(19)

S(1)-C(4) 1.745(17)

S(1)-C(1) 1.888(15)

C(2)-C(3) 1.472(18)

C(4)-C(5) 1.452(17)

S(11)-Pd(1)-S(12) 89.78(5)

S(11)-Pd(1)-S(16) 176.57(3)

S(12)-Pd(1)-S(16) 89.47(5)

S(11)-Pd(1)-S(17) 90.32(5)

S(12)-Pd(1)-S(17) 175.93(3)

S(16)-Pd(1)-S(17) 90.19(5)

S(11)-Pd(1)-Pd(1)#1 92.58(3)

S(12)-Pd(1)-Pd(1)#1 92.16(4)

S(16)-Pd(1)-Pd(1)#1 90.80(3)

S(17)-Pd(1)-Pd(1)#1 91.90(4)

C(11)-S(11)-Pd(1) 101.92(11)

C(12)-S(12)-Pd(1) 101.63(11)

C(13)-S(13)-C(11) 97.62(15)

C(13)-S(14)-C(12) 97.32(15)

C(14)-S(16)-Pd(1) 101.34(11)

C(15)-S(17)-Pd(1) 101.05(11)

C(16)-S(18)-C(14) 97.57(16)

C(16)-S(19)-C(15) 97.57(16)

C(12)-C(11)-S(11) 123.2(2)

C(12)-C(11)-S(13) 115.4(2)

S(11)-C(11)-S(13) 121.37(17)

C(11)-C(12)-S(12) 123.5(2)

C(11)-C(12)-S(14) 115.8(2)

S(12)-C(12)-S(14) 120.74(17)

S(15)-C(13)-S(13) 122.8(2)

S(15)-C(13)-S(14) 123.4(2)

S(13)-C(13)-S(14) 113.75(18)

C(15)-C(14)-S(16) 123.2(2)

C(15)-C(14)-S(18) 115.9(2)

S(16)-C(14)-S(18) 120.89(18)

C(14)-C(15)-S(17) 124.2(2)

C(14)-C(15)-S(19) 115.3(2)

S(17)-C(15)-S(19) 120.47(18)

S(20)-C(16)-S(18) 123.2(2)

S(20)-C(16)-S(19) 123.2(2)

S(18)-C(16)-S(19) 113.60(18)

C(2)-S(1)-C(4) 98.2(11)

C(2)-S(1)-C(1) 109.3(9)

C(4)-S(1)-C(1) 98.2(8)

C(3)-C(2)-S(1) 112.6(17)

C(5)-C(4)-S(1) 98.2(15)

_____________________________________________________________

Symmetry transformations used to generate equivalent atoms:

#1 -x,-y+1,-z+1

Table S19. Anisotropic displacement parameters (A^2 x 10^3) for (SMeEt2)0.5[Pd(dmit)2] (**2**) at .room temperature

.

The anisotropic displacement factor exponent takes the form:

-2 pi^2 [ h^2 a*^2 U11 + ... + 2 h k a* b* U12 ]

_______________________________________________________________________

U11 U22 U33 U23 U13 U12

_______________________________________________________________________

Pd(1) 28(1) 30(1) 29(1) 3(1) 11(1) -1(1)

S(11) 43(1) 35(1) 30(1) 1(1) 13(1) -7(1)

S(12) 41(1) 39(1) 30(1) 3(1) 9(1) -7(1)

S(13) 44(1) 40(1) 44(1) 8(1) 19(1) -6(1)

S(14) 41(1) 40(1) 44(1) -2(1) 11(1) -11(1)

S(15) 65(1) 42(1) 88(1) 7(1) 30(1) -16(1)

S(16) 39(1) 34(1) 31(1) 5(1) 12(1) -3(1)

S(17) 41(1) 35(1) 31(1) 2(1) 13(1) -5(1)

S(18) 54(1) 36(1) 50(1) 10(1) 24(1) -1(1)

S(19) 49(1) 35(1) 50(1) 0(1) 12(1) -8(1)

S(20) 99(1) 41(1) 91(1) 13(1) 24(1) -21(1)

C(11) 26(1) 31(1) 36(1) 4(1) 12(1) -1(1)

C(12) 25(1) 29(1) 36(1) 1(1) 12(1) 1(1)

C(13) 29(1) 38(2) 55(2) 5(1) 17(1) -3(1)

C(14) 30(1) 31(1) 40(2) 9(1) 17(1) 3(1)

C(15) 29(1) 27(1) 42(2) 1(1) 14(1) 1(1)

C(16) 42(2) 36(2) 63(2) 8(1) 18(2) -2(1)

S(1) 96(2) 128(3) 55(1) 3(2) 4(1) 4(2)

C(1) 152(14) 99(7) 128(12) 34(8) 70(11) 35(8)

C(2) 247(19) 167(16) 144(14) 41(13) 61(15) -61(16)

C(3) 147(16) 440(40) 97(14) 50(20) 16(10) -118(19)

C(4) 155(11) 153(15) 103(11) 5(10) 22(10) 65(12)

C(5) 260(30) 280(30) 175(19) -95(18) 140(20) -140(20)

_______________________________________________________________________

Table S20. Hydrogen coordinates ( x 10^4) and isotropic

displacement parameters (A^2 x 10^3) for (SMeEt2)0.5[Pd(dmit)2] (**2**) at .room temperature

.

________________________________________________________________

x y z U(eq)

________________________________________________________________

H(1A) 4086 -969 -1289 183

H(1B) 4938 -1184 1237 183

H(1C) 6207 -1176 -172 183

H(2A) 4893 426 -2050 220

H(2B) 6137 963 -76 220

H(3A) 8328 -181 127 340

H(3B) 8307 492 -1165 340

H(3C) 7210 -192 -2518 340

H(4A) 3127 918 703 182

H(4B) 2463 187 -918 182

H(5A) 2577 -401 1931 330

H(5B) 2020 393 2810 330

H(5C) 4085 85 3745 330

________________________________________________________________

Table S21 : Short S…S distances (< 3.70 Å) between the Pd(dmit)2 units in (SMeEt2)0.5[Pd(dmit)2] (**2**) at room temperature

Atoms Symmetry operation Distance (Å)

S11 S11 -x,-y+1,-z 3.4299(18)

S11 S12 x,+y,+z-1 3.5461(25)

S11 S16 x,+y,+z-1 3.4592(19)

S11 S16 -x,-y+1,-z+1 3.2885(22)

S11 S17 -x,-y+1,-z 3.4645(19)

S12 S12 -x+1,-y+1,-z+2 3.5502(18)

S12 S13 x,+y,+z+1 3.4738(21)

S12 S16 -x+1,-y+1,-z+2 3.6368(20)

S12 S17 -x,-y+1,-z+1 3.3162(22)

Atoms Symmetry operation Distance (Å)

S13 S16 -x+1,-y+1,-z+1 3.6989(25)

S13 S17 -x,-y+1,-z 3.4975(19)

S13 S18 -x,-y+1,-z+1 3.6636(24)

S14 S16 -x+1,-y+1,-z+2 3.5340(19)

S14 S17 -x+1,-y+1,-z+1 3.6817(25)

S14 S19 -x,-y+1,-z+1 3.6694(24)

S16 S17 x,+y,+z+1 3.5313(25)

S17 S18 x,+y,+z-1 3.6157(21)

S20 S20 -x,-y,-z+1 3.5134(18)
